# Supplementary material for: The Sexual Development, Sexual Health, Sexual Experiences, and Sexual Knowledge of Forensic Mental Health Patients: A Research Design and Methodology Protocol
Source: Frontiers journal article supplement (doi:10.3389/fpsyt.2021.651839), 2021-06-04
Supplement: Data_Sheet_1.PDF [file Data_Sheet_1.PDF]

# General Sexual Knowledge Questionnaire

## Screening Question

**1. Have you ever have any sex education?**

*Mark only one oval.*

- ☐ Yes
- ☐ No
- ☐ Can not remember
- ☐ Other: \_\_\_\_\_

**2. By whom?**

*Check all that apply.*

- ☐ Parents
- ☐ Peers
- ☐ School
- ☐ TV
- ☐ Other

**3. Have you ever had a discussion about sex related matters with anyone?**

*Mark only one oval.*

- ☐ Yes
- ☐ No
- ☐ Maybe

**4. With whom?**

*Check all that apply.*

- ☐ Parents
- ☐ Peers
- ☐ School / Educational staff
- ☐ Medical / health care staff
- ☐ Others

## Physiology: Pictures

I am now going to show you a picture of a man. I would like you to put a cross on the part of the body I describe. If you are not sure about the word I am using please tell me. There are lots of words used to describe parts of the body and you may use a different word to describe that part of the body.

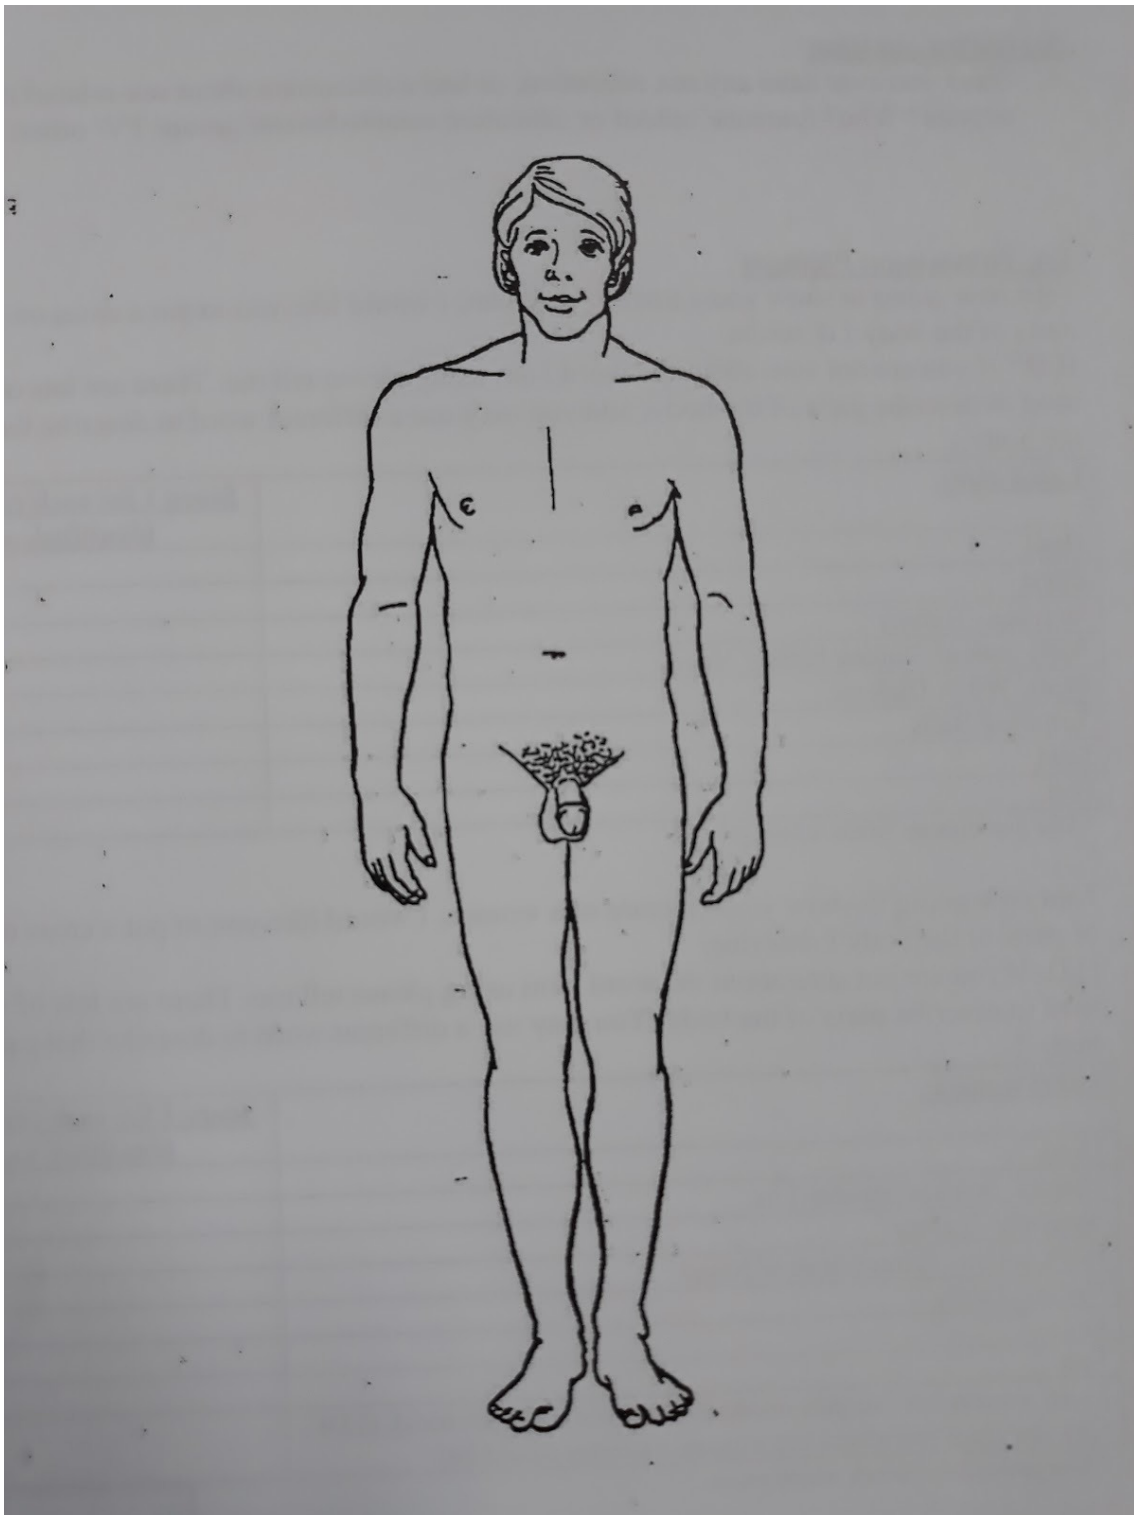

**5. Label man:**

*Check all that apply.*

- ☐ Head
- ☐ Chest
- ☐ Stomach / Tummy
- ☐ Belly Button / Tummy Button / Navel
- ☐ Penis / Dick / Willy etc
- ☐ Testicles / Balls
- ☐ Legs
- ☐ Feet

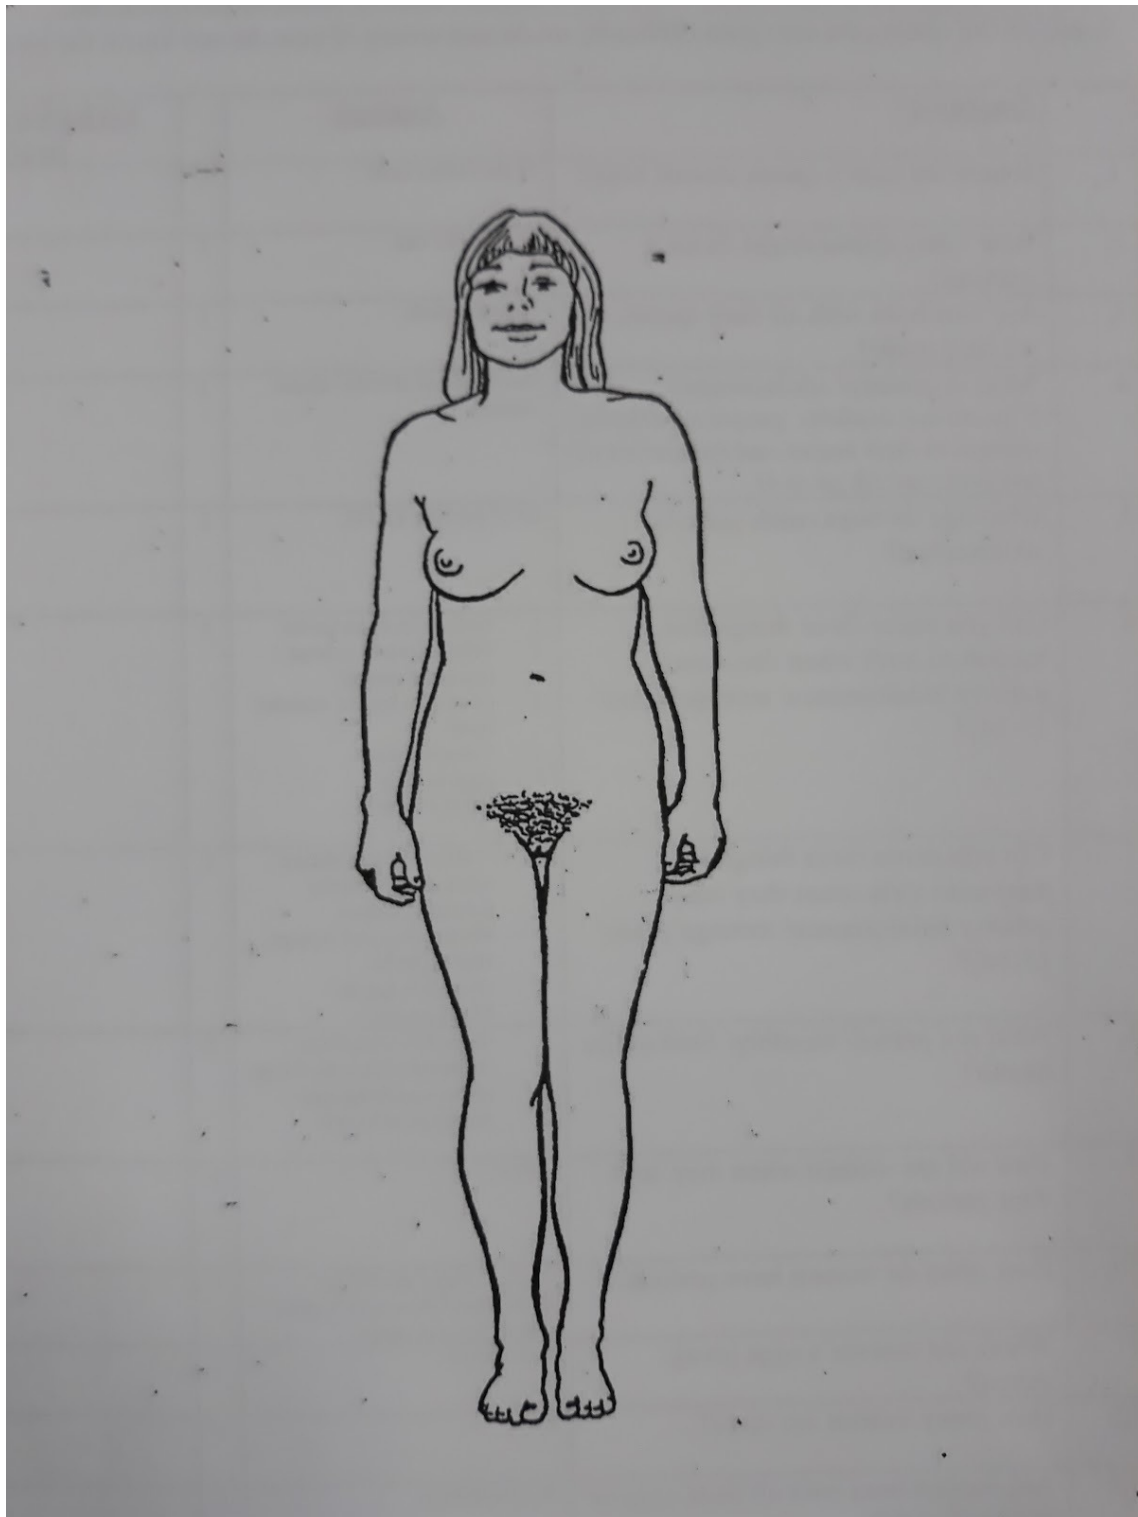

**6. Label for woman:**

*Check all that apply.*

- ☐ Head
- ☐ Breasts / Bosoms / Boobs / Tits
- ☐ Stomach / Tummy
- ☐ Belly Button / Tummy Button / Navel
- ☐ Vagina / Fanny
- ☐ Legs
- ☐ Feet
- ☐ Women have organs inside their bodies called ovaries. Can you show me where the ovaries would be?

## Physiology Questions

These are some questions about men and women. answer them the best you can. some of the questions are quite difficult, so dont worry if you do not know the answer.

**7. Where are men's sperm stored?**

*Check all that apply.*

- ☐ Tick box if Answer: In Testes/Balls

**8. How many sperm might fit on a pinhead?**

*Check all that apply.*

- ☐ Tick box if Answer: Thousands / Lots

**9. Are men born with all their sperms or are they made?**

*Check all that apply.*

- ☐ Tick box if Answer: They are made

**10. What is puberty / adolescence? If no answer explain "people experience changes in their bodies and themselves as they grow up and skip next question)**

*Check all that apply.*

- ☐ Tick box if Answer: Development of body / Sexual maturity

**11. What age do boys reach puberty / adolescence?**

*Check all that apply.*

- ☐ Tick box if answer 10-18 (usually 13-14)

**12. Can you name 3 things that happen to boys when they reach puberty? (adolescence, teenage years, 13-14)**

*Check all that apply.*

- ☐ Increase in testosterone
- ☐ Penis / scrotum enlarge (sexual maturity)
- ☐ Growth in height / muscle / bone
- ☐ Voice breaks
- ☐ Hair on body
- ☐ Mood swings

**13. Can you name 3 things that happen to girls when they reach puberty? (adolescence, teenage years, 13-14)**

*Check all that apply.*

- ☐ Uterus / Ovaries / Uterine tubes reach maturity
- ☐ Breasts develop / enlarge
- ☐ Hair on body
- ☐ Growth in height
- ☐ Mood swings

**14. What is a period / time of the month?**

*Check all that apply.*

- ☐ When the ovum is not fertilised
- ☐ When the lining of the womb changes
- ☐ Discharge of blood

**15. How old are women when they start their periods?**

*Check all that apply.*

- ☐ tick box if answer 10-18 years

**16. How often do women have periods?**

*Check all that apply.*

- ☐ Tick box if answer once a month / every 26 to 30 days

**17. Where are a women's eggs (ova) stored?**

*Check all that apply.*

- ☐ Tick box if answer the ovaries

**18. How many ovaries are there?**

*Check all that apply.*

- ☐ tick the box if answer 2

**19. Are women born with all their eggs or are they made?**

*Check all that apply.*

- ☐ Tick the box if answer - born with them.

## Sexual Intercourse

These are some questions about sexual intercourse or having sex. answer them as best as you can. Some of the questions are quite difficult, so do not worry if you don't know the answer.

**20. SCREEN: Can you tell me what intercourse / having sex is?**

*Check all that apply.*

☐ Tick box if answer is - when the penis is put inside the vagina. also include oral / anal sex

☐ Tick box if further explanation were required

**21. What is a virgin?**

*Check all that apply.*

☐ Tick box if answer is - someone who has not had sex / intercourse

**22. Can you have sex when a woman is having a period?**

*Mark only one oval.*

☐ Yes

☐ No

☐ Maybe

**23. What is an erection (hard on)?**

*Check all that apply.*

☐ Tick box if answer - penis becoming rigid during sexual excitement

**24. What is ejaculation (coming)?**

*Check all that apply.*

☐ Expulsion of semen / when a man comes (during sex / at night / masturbation)

**25. What is impotence?**

*Check all that apply.*

☐ Tick box if answer inability to achieve an erection

**26. What is a prostitute / lady or man on street?**

*Check all that apply.*

☐ Tick box if answer - a person who has intercourse / sex for money / sex industry worker

**27. What is incest?**

*Check all that apply.*

☐ Tick box if answer - intercourse / sex with an immediate relative

## Masturbation

**28. SCREEN: What is masturbation / wanking / jerking off / play with self?**

*Check all that apply.*

- ☐ Tick the box if answer self-stimulation of the genitals
- ☐ Tick the box if further explanation were required

**29. Does masturbation / wanking / jerking off / playing with self have any negative / bad effects for your health?**

*Mark only one oval.*

- ☐ Yes
- ☐ No
- ☐ Maybe

## Pregnancy

These are some questions about pregnancy. Answer them as best as you can. Some of the questions are quite difficult, so don't worry if you do not know the answer.

**30. Screen: Can you tell me what pregnant means?**

*Check all that apply.*

- ☐ Tick the box if answer: When a woman is going to have a baby.
- ☐ Tick the box if further explanation were required

**31. How do a women become pregnant?**

*Check all that apply.*

- ☐ By having sexual intercourse
- ☐ Sperm fertilise eggs (including IVF)

**32. How long does it take from getting pregnant to having a baby?**

*Check all that apply.*

- ☐ Tick box if answer 9 months

**33. How does a women know that she is pregnant?**

*Check all that apply.*

- ☐ No periods / period stops
- ☐ Pregnancy test / GP
- ☐ Morning sickness / nausea
- ☐ Heavy, tender breasts
- ☐ Vaginal discharge / irritation
- ☐ Cravings
- ☐ Stomach is bigger
- ☐ Hormone changes - mood swings, temperature changes
- ☐ Tiredness
- ☐ Sense of knowing

**34. When is the risk of pregnancy least during a woman's monthly cycle?**

*Check all that apply.*

☐ Tick box if answer: when they are having a period (approx 2%)

**35. From what part of a woman does the baby come out?**

*Check all that apply.*

☐ Tick box if answer - Vagina / womb / uterus

**36. What is the belly button / tummy button / navel?**

*Check all that apply.*

☐ Tick box if answer: remains of the cord connecting mother and baby.

**37. When is the risk of pregnancy highest during a woman's monthly cycle?**

*Check all that apply.*

☐ Tick box if answer on day 7 - 14 of her cycle

## Contraception

These are some questions about contraception. Answer them as best as you can. Some of the questions are quite difficult, so don't worry if you do not know the answer.

**38. SCREEN: Can you tell me what is birth control / contraception?**

*Check all that apply.*

☐ Tick the box if answer: method of stopping fertilisation / having babies

☐ Tick the box if further explanation were required

**39. Can you name three types of contraception:**

*Check all that apply.*

☐ Abstinence / not having sex

☐ Cap / diaphragm

☐ Coil / IUD/ Loop

☐ Condom

☐ Contraceptive pill

☐ Foam / Jelly / Cream

☐ Injection / Depo Provera

☐ Implant

☐ Natural / Rythm / Safe days

☐ Oral / anal sex

☐ Sterilisation for female

☐ Vasectomy for male

☐ Withdrawal



**40. Can you explain how they work?**

*Mark only one oval per row.*

|          | Yes                   | No                    | Stops babies          |
|----------|-----------------------|-----------------------|-----------------------|
| Method 1 | <input type="radio"/> | <input type="radio"/> | <input type="radio"/> |
| Method 2 | <input type="radio"/> | <input type="radio"/> | <input type="radio"/> |
| Method 3 | <input type="radio"/> | <input type="radio"/> | <input type="radio"/> |

**41. Can you name three places where you might buy / be given contraceptives?**

*Check all that apply.*

- ☐ Family planning clinic
- ☐ Health Centre
- ☐ Other clinic
- ☐ GP
- ☐ Hospital
- ☐ Private Hospital / Clinic / GP
- ☐ Chemist / Pharmacy
- ☐ Other shop / garage / pub
- ☐ Community Health worker
- ☐ Friend / Relative / Care worker

**42. Can you name any other forms of contraception:**

*Check all that apply.*

- ☐ Abstinence / not having sex
- ☐ Cap / diaphragm
- ☐ Coil / IUD/ Loop
- ☐ Condom
- ☐ Contraceptive pill
- ☐ Foam / Jelly / Cream
- ☐ Injection / Depo Provera
- ☐ Implant
- ☐ Natural / Rythm / Safe days
- ☐ Oral / anal sex
- ☐ Sterilisation for female
- ☐ Vasectomy for male
- ☐ Withdrawal

## Sexually Transmitted Diseases

These are some questions about STD's / Sexually transmitted infections / Venereal diseases. Answer them as best as you can. Some of the questions are quite difficult, so don't worry if you do not know the answer.

**43. SCREEN: What is an STD/STI/Venereal disease?**

*Check all that apply.*

- ☐ Tick box if further explanation required.
- ☐ Tick box if answer: Infection or disease that has been transmitted through intercourse / sex
- ☐ Tick box if answer: Infection or disease that has been transmitted by having unprotected sex (penetrative / anal / oral)

**44. Can you name five STD's?**

*Check all that apply.*

- ☐ Chlamydia
- ☐ Herpes Simplex
- ☐ Gonorrhoea / Clap
- ☐ Trichomoniasis
- ☐ Syphilis / Pox
- ☐ Genital warts
- ☐ HIV / AIDS
- ☐ Hepatitis B or C
- ☐ Thrush
- ☐ Crab / Lice

**45. Can you name any symptoms you might get if you had an STD?**

*Check all that apply.*

- ☐ Damage to the immune system
- ☐ Soreness
- ☐ Itching
- ☐ Blisters / Sores / Warts
- ☐ Pain when passing urine
- ☐ Pain when having sex
- ☐ Discharge (smell)
- ☐ Flu-like symptoms
- ☐ Death
- ☐ Don't always have symptoms

**46. Which contraceptives can help prevent STD's?**

*Check all that apply.*

- ☐ Tick box if answer: condom

**47. What is HIV?**

*Check all that apply.*

- ☐ Human immunodeficiency virus
- ☐ Virus that attacks the immune system

**48. What is the difference between HIV / AIDS?**

*Check all that apply.*

☐ Tick box if answer: a person has AIDS when HIV weakens the body so much that certain illness develop

**49. How might someone become infected with HIV?**

*Check all that apply.*

- ☐ Sexual intercourse / vaginal / anal / oral
- ☐ Exposure to blood - injection, transfusion or non sterile equipment
- ☐ mother to baby - womb, breastmilk

**50. How can you protect yourself from the risk of getting HIV?**

*Check all that apply.*

- ☐ Sex using a condom
- ☐ Non penetrative sex
- ☐ Sterile needles

## Sexuality

These are some questions about sexuality. Answer them as best as you can. Some of the questions are quite difficult, so don't worry if you do not know the answer.

**51. SCREEN: What is a homosexual (gay/lesbian)**

*Check all that apply.*

- ☐ tick box if answer: someone who is attracted to people of the same sex.
- ☐ tick if further explanation were required

**52. What is a heterosexual (straight)?**

*Check all that apply.*

- ☐ Tick box if answer: someone who is attracted to people of the opposite sex.

**53. What is a bisexual ?**

*Check all that apply.*

- ☐ Tick box if answer: someone who is attracted to people of the same or opposite sex.

## Wrap up

That is the end of the questions. Thank you.

Do you have any questions or would you like for any information on any of the topics we have talked about today?
